# Supplementary material
Source: ML conference proceedings conference paper supplement (https://openaccess.thecvf.com/content/WACV2026/html/Yan_3DSceneEditor_Controllable_3D_WACV_2026_paper.html)
Supplement: Supplementary file 2 [file color_mapping.pdf › Supplementary Material/color_mapping.pdf]

| Color Effect | Color Name      | RGB         | Hexadecimal | Color Effect | Color Name     | RGB         | Hexadecimal |
|--------------|-----------------|-------------|-------------|--------------|----------------|-------------|-------------|
|              | Snow            | 255 250 250 | #FFFAFA     |              | PaleTurquoise1 | 187 255 255 | #BBFFFF     |
|              | GhostWhite      | 248 248 255 | #F8F8FF     |              | PaleTurquoise2 | 174 238 238 | #AEEEEEE    |
|              | WhiteSmoke      | 245 245 245 | #F5F5F5     |              | PaleTurquoise3 | 150 205 205 | #96CDCD     |
|              | Gainsboro       | 220 220 220 | #DCDCDC     |              | PaleTurquoise4 | 102 139 139 | #668B8B     |
|              | FloralWhite     | 255 250 240 | #FFFAF0     |              | CadetBlue1     | 152 245 255 | #98F5FF     |
|              | OldLace         | 253 245 230 | #FDF5E6     |              | CadetBlue2     | 142 229 238 | #8EE5EE     |
|              | Linen           | 250 240 230 | #FAF0E6     |              | CadetBlue3     | 122 197 205 | #7AC5CD     |
|              | AntiqueWhite    | 250 235 215 | #FAEBD7     |              | CadetBlue4     | 83 134 139  | #53868B     |
|              | PapayaWhip      | 255 239 213 | #FFEFD5     |              | Turquoise1     | 0 245 255   | #00F5FF     |
|              | BlanchedAlmond  | 255 235 205 | #FFEBCD     |              | Turquoise2     | 0 229 238   | #00E5EE     |
|              | Bisque          | 255 228 196 | #FFE4C4     |              | Turquoise3     | 0 197 205   | #00C5CD     |
|              | PeachPuff       | 255 218 185 | #FFDAB9     |              | Turquoise4     | 0 134 139   | #00868B     |
|              | NavajoWhite     | 255 222 173 | #FEDEAT     |              | Cyan1          | 0 255 255   | #00FFFF     |
|              | Moccasin        | 255 228 181 | #FFE4B5     |              | Cyan2          | 0 238 238   | #00EEEE     |
|              | Cornsilk        | 255 248 220 | #FFF8DC     |              | Cyan3          | 0 205 205   | #00CDCD     |
|              | Ivory           | 255 255 240 | #FFFFFF0    |              | Cyan4          | 0 139 139   | #008B8B     |
|              | LemonChiffon    | 255 250 205 | #FFFACD     |              | DarkSlateGray1 | 151 255 255 | #97FFFF     |
|              | Seashell        | 255 245 238 | #FFF5EE     |              | DarkSlateGray2 | 141 238 238 | #8DEEEE     |
|              | Honeydew        | 240 255 240 | #F0FFF0     |              | DarkSlateGray3 | 121 205 205 | #79CDCD     |
|              | MintCream       | 245 255 250 | #F5FFFA     |              | DarkSlateGray4 | 82 139 139  | #528B8B     |
|              | Azure           | 240 255 255 | #F0FFFF     |              | Aquamarine1    | 127 255 212 | #7FFFD4     |
|              | AliceBlue       | 240 248 255 | #F0F8FF     |              | Aquamarine2    | 118 238 198 | #76EEC6     |
|              | lavender        | 230 230 250 | #E6E6FA     |              | Aquamarine3    | 102 205 170 | #66 CDAA    |
|              | LavenderBlush   | 255 240 245 | #FFF0F5     |              | Aquamarine4    | 69 139 116  | #458B74     |
|              | MistyRose       | 255 228 225 | #FFE4E1     |              | DarkSeaGreen1  | 193 255 193 | #C1FFC1     |
|              | White           | 255 255 255 | #FFFFFFF    |              | DarkSeaGreen2  | 180 238 180 | #B4EEB4     |
|              | Black           | 0 0 0       | #000000     |              | DarkSeaGreen3  | 155 205 155 | #9BCD9B     |
|              | DarkSlateGray   | 47 79 79    | #2F4F4F     |              | DarkSeaGreen4  | 105 139 105 | #698B69     |
|              | Dim Grey        | 105 105 105 | #696969     |              | SeaGreen1      | 84 255 159  | #54FF9F     |
|              | SlateGrey       | 112 128 144 | #708090     |              | SeaGreen2      | 78 238 148  | #4EEE94     |
|              | LightSlateGray  | 119 136 153 | #778899     |              | SeaGreen3      | 67 205 128  | #43CD80     |
|              | Grey            | 190 190 190 | #BEBEBE     |              | SeaGreen4      | 46 139 87   | #2E8B57     |
|              | LightGray       | 211 211 211 | #D3D3D3     |              | PaleGreen1     | 154 255 154 | #9AFF9A     |
|              | MidnightBlue    | 25 25 112   | #191970     |              | PaleGreen2     | 144 238 144 | #90EE90     |
|              | Navy Blue       | 0 0 128     | #000080     |              | PaleGreen3     | 124 205 124 | #7CCD7C     |
|              | CornflowerBlue  | 100 149 237 | #6495ED     |              | PaleGreen4     | 84 139 84   | #548B54     |
|              | DarkSlateBlue   | 72 61 139   | #483D8B     |              | SpringGreen1   | 0 255 127   | #00FF7F     |
|              | SlateBlue       | 106 90 205  | #6A5ACD     |              | SpringGreen2   | 0 238 118   | #00EE76     |
|              | MediumSlateBlue | 123 104 238 | #7B68EE     |              | SpringGreen3   | 0 205 102   | #00CD66     |
|              | LightSlateBlue  | 132 112 255 | #8470FF     |              | SpringGreen4   | 0 139 69    | #008B45     |
|              | MediumBlue      | 0 0 205     | #0000CD     |              | Green1         | 0 255 0     | #00FF00     |
|              | RoyalBlue       | 65 105 225  | #4169E1     |              | Green2         | 0 238 0     | #00EE00     |

|  |                  |             |          |  |                 |             |         |
|--|------------------|-------------|----------|--|-----------------|-------------|---------|
|  | Blue             | 0 0 255     | #0000FF  |  | Green3          | 0 205 0     | #00CD00 |
|  | DodgerBlue       | 30 144 255  | #1E90FF  |  | Green4          | 0 139 0     | #008B00 |
|  | DeepSkyBlue      | 0 191 255   | #00BFFF  |  | Chartreuse1     | 127 255 0   | #7FFF00 |
|  | SkyBlue          | 135 206 235 | #87 CEEB |  | Chartreuse2     | 118 238 0   | #76EE00 |
|  | LightSkyBlue     | 135 206 250 | #87 CEFA |  | Chartreuse3     | 102 205 0   | #66CD00 |
|  | SteelBlue        | 70 130 180  | #4682B4  |  | Chartreuse4     | 69 139 0    | #458B00 |
|  | LightSteelBlue   | 176 196 222 | #B0C4DE  |  | OliveDrab1      | 192 255 62  | #C0FF3E |
|  | LightBlue        | 173 216 230 | #ADD8E6  |  | OliveDrab2      | 179 238 58  | #B3EE3A |
|  | PowderBlue       | 176 224 230 | #B0E0E6  |  | OliveDrab3      | 154 205 50  | #9ACD32 |
|  | PaleTurquoise    | 175 238 238 | #AFEEEE  |  | OliveDrab4      | 105 139 34  | #698B22 |
|  | DarkTurquoise    | 0 206 209   | #00CED1  |  | DarkOliveGreen1 | 202 255 112 | #CAFF70 |
|  | MediumTurquoise  | 72 209 204  | #48D1CC  |  | DarkOliveGreen2 | 188 238 104 | #BCEE68 |
|  | Turquoise        | 64 224 208  | #40E0D0  |  | DarkOliveGreen3 | 162 205 90  | #A2CD5A |
|  | Cyan             | 0 255 255   | #00FFFF  |  | DarkOliveGreen4 | 110 139 61  | #6E8B3D |
|  | LightCyan        | 224 255 255 | #E0FFFF  |  | Khaki1          | 255 246 143 | #FFF68F |
|  | CadetBlue        | 95 158 160  | #5F9EA0  |  | Khaki2          | 238 230 133 | #EEE685 |
|  | MediumAquamarine | 102 205 170 | #66 CDAA |  | Khaki3          | 205 198 115 | #CDC673 |
|  | Aquamarine       | 127 255 212 | #7FFFD4  |  | Khaki4          | 139 134 78  | #8B864E |
|  | DarkGreen        | 0 100 0     | #006400  |  | LightGoldenrod1 | 255 236 139 | #FFEC8B |
|  | DarkOliveGreen   | 85 107 47   | #556B2F  |  | LightGoldenrod2 | 238 220 130 | #EEDC82 |
|  | DarkSeaGreen     | 143 188 143 | #8FBC8F  |  | LightGoldenrod3 | 205 190 112 | #CDBE70 |
|  | SeaGreen         | 46 139 87   | #2E8B57  |  | LightGoldenrod4 | 139 129 76  | #8B814C |
|  | MediumSeaGreen   | 60 179 113  | #3CB371  |  | LightYellow1    | 255 255 224 | #FFFFE0 |
|  | LightSeaGreen    | 32 178 170  | #20B2AA  |  | LightYellow2    | 238 238 209 | #EEEEED |
|  | PaleGreen        | 152 251 152 | #98FB98  |  | LightYellow3    | 205 205 180 | #CDCDB4 |
|  | SpringGreen      | 0 255 127   | #00FF7F  |  | LightYellow4    | 139 139 122 | #8B8B7A |
|  | LawnGreen        | 124 252 0   | #7CFC00  |  | Yellow1         | 255 255 0   | #FFFF00 |
|  | Green            | 0 255 0     | #00FF00  |  | Yellow2         | 238 238 0   | #EEEE00 |
|  | Chartreuse       | 127 255 0   | #7FFF00  |  | Yellow3         | 205 205 0   | #CDCD00 |
|  | MedSpringGreen   | 0 250 154   | #00FA9A  |  | Yellow4         | 139 139 0   | #8B8B00 |
|  | GreenYellow      | 173 255 47  | #ADFF2F  |  | Gold1           | 255 215 0   | #FFD700 |
|  | LimeGreen        | 50 205 50   | #32CD32  |  | Gold2           | 238 201 0   | #EEC900 |
|  | YellowGreen      | 154 205 50  | #9ACD32  |  | Gold3           | 205 173 0   | #CDAD00 |
|  | ForestGreen      | 34 139 34   | #228B22  |  | Gold4           | 139 117 0   | #8B7500 |
|  | OliveDrab        | 107 142 35  | #6B8E23  |  | Goldenrod1      | 255 193 37  | #FFC125 |
|  | DarkKhaki        | 189 183 107 | #BDB76B  |  | Goldenrod2      | 238 180 34  | #EEB422 |
|  | PaleGoldenrod    | 238 232 170 | #EEE8AA  |  | Goldenrod3      | 205 155 29  | #CD9B1D |
|  | LtGoldenrodYello | 250 250 210 | #FAFAD2  |  | Goldenrod4      | 139 105 20  | #8B6914 |
|  | LightYellow      | 255 255 224 | #FFFFE0  |  | DarkGoldenrod1  | 255 185 15  | #FFB90F |
|  | Yellow           | 255 255 0   | #FFFF00  |  | DarkGoldenrod2  | 238 173 14  | #EEAD0E |
|  | Gold             | 255 215 0   | #FFD700  |  | DarkGoldenrod3  | 205 149 12  | #CD950C |
|  | LightGoldenrod   | 238 221 130 | #EEDD82  |  | DarkGoldenrod4  | 139 101 8   | #8B658B |
|  | goldenrod        | 218 165 32  | #DAA520  |  | RosyBrown1      | 255 193 193 | #FFC1C1 |
|  | DarkGoldenrod    | 184 134 11  | #B8860B  |  | RosyBrown2      | 238 180 180 | #EEB4B4 |

|  |                                                                                     |                 |             |         |                                                                                      |              |             |         |
|--|-------------------------------------------------------------------------------------|-----------------|-------------|---------|--------------------------------------------------------------------------------------|--------------|-------------|---------|
|  |       | RosyBrown       | 188 143 143 | #BC8F8F |       | RosyBrown3   | 205 155 155 | #CD9B9B |
|  |      | IndianRed       | 205 92 92   | #CD5C5C |      | RosyBrown4   | 139 105 105 | #8B6969 |
|  |     | SaddleBrown     | 139 69 19   | #8B4513 |     | IndianRed1   | 255 106 106 | #FF6A6A |
|  |    | Sienna          | 160 82 45   | #A0522D |    | IndianRed2   | 238 99 99   | #EE6363 |
|  |    | Peru            | 205 133 63  | #CD853F |    | IndianRed3   | 205 85 85   | #CD5555 |
|  |    | Burlywood       | 222 184 135 | #DEB887 |    | IndianRed4   | 139 58 58   | #8B3A3A |
|  |    | Beige           | 245 245 220 | #F5F5DC |    | Sienna1      | 255 130 71  | #FF8247 |
|  |    | Wheat           | 245 222 179 | #F5DEB3 |    | Sienna2      | 238 121 66  | #EE7942 |
|  |    | SandyBrown      | 244 164 96  | #F4A460 |    | Sienna3      | 205 104 57  | #CD6839 |
|  |    | Tan             | 210 180 140 | #D2B48C |    | Sienna4      | 139 71 38   | #8B4726 |
|  |    | Chocolate       | 210 105 30  | #D2691E |    | Burlywood1   | 255 211 155 | #FFD39B |
|  |    | Firebrick       | 178 34 34   | #B22222 |    | Burlywood2   | 238 197 145 | #EEC591 |
|  |    | Brown           | 165 42 42   | #A52A2A |    | Burlywood3   | 205 170 125 | #CDAA7D |
|  |    | DarkSalmon      | 233 150 122 | #E9967A |    | Burlywood4   | 139 115 85  | #8B7355 |
|  |    | Salmon          | 250 128 114 | #FA8072 |    | Wheat1       | 255 231 186 | #FFE7BA |
|  |    | LightSalmon     | 255 160 122 | #FFA07A |    | Wheat2       | 238 216 174 | #EED8AE |
|  |    | Orange          | 255 165 0   | #FFA500 |    | Wheat3       | 205 186 150 | #CDBA96 |
|  |    | DarkOrange      | 255 140 0   | #FF8C00 |    | Wheat4       | 139 126 102 | #8B7E66 |
|  |    | Coral           | 255 127 80  | #FF7F50 |    | Tan1         | 255 165 79  | #FFA54F |
|  |    | LightCoral      | 240 128 128 | #F08080 |    | Tan2         | 238 154 73  | #EE9A49 |
|  |    | Tomato          | 255 99 71   | #FF6347 |    | Tan3         | 205 133 63  | #CD853F |
|  |   | OrangeRed       | 255 69 0    | #FF4500 |   | Tan4         | 139 90 43   | #8B5A2B |
|  |  | Red             | 255 0 0     | #FF0000 |  | Chocolate1   | 255 127 36  | #FF7F24 |
|  |  | HotPink         | 255 105 180 | #FF69B4 |  | Chocolate2   | 238 118 33  | #EE7621 |
|  |  | DeepPink        | 255 20 147  | #FF1493 |  | Chocolate3   | 205 102 29  | #CD661D |
|  |  | Pink            | 255 192 203 | #FFC0CB |  | Chocolate4   | 139 69 19   | #8B4513 |
|  |  | LightPink       | 255 182 193 | #FFB6C1 |  | Firebrick1   | 255 48 48   | #FF3030 |
|  |  | Pale Violet Red | 219 112 147 | #DB7093 |  | Firebrick2   | 238 44 44   | #EE2C2C |
|  |  | Maroon          | 176 48 96   | #B03060 |  | Firebrick3   | 205 38 38   | #CD2626 |
|  |  | MediumVioletRed | 199 21 133  | #C71585 |  | Firebrick4   | 139 26 26   | #8B1A1A |
|  |  | VioletRed       | 208 32 144  | #D02090 |  | Brown1       | 255 64 64   | #FF4040 |
|  |  | Magenta         | 255 0 255   | #FF00FF |  | Brown2       | 238 59 59   | #EE3B3B |
|  |  | Violet          | 238 130 238 | #EE82EE |  | Brown3       | 205 51 51   | #CD3333 |
|  |  | Plum            | 221 160 221 | #DAD0DD |  | Brown4       | 139 35 35   | #8B2323 |
|  |  | Orchid          | 218 112 214 | #DA70D6 |  | Salmon1      | 255 140 105 | #FF8C69 |
|  |  | MediumOrchid    | 186 85 211  | #BA55D3 |  | Salmon2      | 238 130 98  | #EE8262 |
|  |  | DarkOrchid      | 153 50 204  | #9932CC |  | Salmon3      | 205 112 84  | #CD7054 |
|  |  | DarkViolet      | 148 0 211   | #9400D3 |  | Salmon4      | 139 76 57   | #8B4C39 |
|  |  | BlueViolet      | 138 43 226  | #8A2BE2 |  | LightSalmon1 | 255 160 122 | #FFA07A |
|  |  | Purple          | 160 32 240  | #A020F0 |  | LightSalmon2 | 238 149 114 | #EE9572 |
|  |  | MediumPurple    | 147 112 219 | #9370DB |  | LightSalmon3 | 205 129 98  | #CD8162 |
|  |  | Thistle         | 216 191 216 | #D8BFD8 |  | LightSalmon4 | 139 87 66   | #8B5742 |
|  |  | Snow1           | 255 250 250 | #FFFAFA |  | Orange1      | 255 165 0   | #FFA500 |
|  |  | Snow2           | 238 233 233 | #EEE9E9 |  | Orange2      | 238 154 0   | #EE9A00 |

|  |                                                                                     |                |             |          |                                                                                      |                |             |         |
|--|-------------------------------------------------------------------------------------|----------------|-------------|----------|--------------------------------------------------------------------------------------|----------------|-------------|---------|
|  |       | Snow3          | 205 201 201 | #CDC9C9  |       | Orange3        | 205 133 0   | #CD8500 |
|  |     | Snow4          | 139 137 137 | #8B8989  |     | Orange4        | 139 90 0    | #8B5A00 |
|  |    | Seashell1      | 255 245 238 | #FFF5EE  |    | DarkOrange1    | 255 127 0   | #FF7F00 |
|  |    | Seashell2      | 238 229 222 | #EEE5DE  |    | DarkOrange2    | 238 118 0   | #EE7600 |
|  |    | Seashell3      | 205 197 191 | #CDC5BF  |    | DarkOrange3    | 205 102 0   | #CD6600 |
|  |    | Seashell4      | 139 134 130 | #8B8682  |    | DarkOrange4    | 139 69 0    | #8B4500 |
|  |    | AntiqueWhite1  | 255 239 219 | #FFEFDB  |    | Coral1         | 255 114 86  | #FF7256 |
|  |    | AntiqueWhite2  | 238 223 204 | #EEDFCC  |    | Coral2         | 238 106 80  | #EE6A50 |
|  |    | AntiqueWhite3  | 205 192 176 | #CDC0B0  |    | Coral3         | 205 91 69   | #CD5B45 |
|  |    | AntiqueWhite4  | 139 131 120 | #8B8378  |    | Coral4         | 139 62 47   | #8B3E2F |
|  |    | Bisque1        | 255 228 196 | #FFE4C4  |    | Tomato1        | 255 99 71   | #FF6347 |
|  |    | Bisque2        | 238 213 183 | #EED5B7  |    | Tomato2        | 238 92 66   | #EE5C42 |
|  |    | Bisque3        | 205 183 158 | #CDB79E  |    | Tomato3        | 205 79 57   | #CD4F39 |
|  |    | Bisque4        | 139 125 107 | #8B7D6B  |    | Tomato4        | 139 54 38   | #8B3626 |
|  |    | PeachPuff1     | 255 218 185 | #FFDAB9  |    | OrangeRed1     | 255 69 0    | #FF4500 |
|  |    | PeachPuff2     | 238 203 173 | #EECBAD  |    | OrangeRed2     | 238 64 0    | #EE4000 |
|  |    | PeachPuff3     | 205 175 149 | #CDAF95  |    | OrangeRed3     | 205 55 0    | #CD3700 |
|  |   | PeachPuff4     | 139 119 101 | #8B7765  |   | OrangeRed4     | 139 37 0    | #8B2500 |
|  |  | NavajoWhite1   | 255 222 173 | #FEDEAT  |  | Red1           | 255 0 0     | #FF0000 |
|  |  | NavajoWhite2   | 238 207 161 | #EECFA1  |  | Network2       | 238 0 0     | #EE0000 |
|  |  | NavajoWhite3   | 205 179 139 | #CDB38B  |  | Red3           | 205 0 0     | #CD0000 |
|  |  | NavajoWhite4   | 139 121 94  | #8B795E  |  | Red4           | 139 0 0     | #8B0000 |
|  |  | LemonChiffon1  | 255 250 205 | #FFFACD  |  | DeepPink1      | 255 20 147  | #FF1493 |
|  |  | LemonChiffon2  | 238 233 191 | #EEE9BF  |  | DeepPink2      | 238 18 137  | #EE1289 |
|  |  | LemonChiffon3  | 205 201 165 | #CDC9A5  |  | DeepPink3      | 205 16 118  | #CD1076 |
|  |  | LemonChiffon4  | 139 137 112 | #8B8970  |  | DeepPink4      | 139 10 80   | #8B0A50 |
|  |  | Cornsilk1      | 255 248 220 | #FFF8DC  |  | HotPink1       | 255 110 180 | #FF6EB4 |
|  |  | Cornsilk2      | 238 232 205 | #EEE8CD  |  | HotPink2       | 238 106 167 | #EE6AA7 |
|  |  | Cornsilk3      | 205 200 177 | #CDC8B1  |  | HotPink3       | 205 96 144  | #CD6090 |
|  |  | Cornsilk4      | 139 136 120 | #8B8878  |  | HotPink4       | 139 58 98   | #8B3A62 |
|  |  | Ivory1         | 255 255 240 | #FFFFF0  |  | Pink1          | 255 181 197 | #FFB5C5 |
|  |  | Ivory2         | 238 238 224 | #EEEEEE0 |  | Pink2          | 238 169 184 | #EEA9B8 |
|  |  | Ivory3         | 205 205 193 | #CDCDC1  |  | Pink3          | 205 145 158 | #CD919E |
|  |  | Ivory4         | 139 139 131 | #8B8B83  |  | Pink4          | 139 99 108  | #8B636C |
|  |  | Honeydew1      | 240 255 240 | #F0FFF0  |  | LightPink1     | 255 174 185 | #FFAEB9 |
|  |  | Honeydew2      | 224 238 224 | #E0EEE0  |  | LightPink2     | 238 162 173 | #EEA2AD |
|  |  | Honeydew3      | 193 205 193 | #C1CDC1  |  | LightPink3     | 205 140 149 | #CD8C95 |
|  |  | Honeydew4      | 131 139 131 | #838B83  |  | LightPink4     | 139 95 101  | #8B5F65 |
|  |  | LavenderBlush1 | 255 240 245 | #FFF0F5  |  | PaleVioletRed1 | 255 130 171 | #FF82AB |
|  |  | LavenderBlush2 | 238 224 229 | #EEE0E5  |  | PaleVioletRed2 | 238 121 159 | #EE799F |
|  |                                                                                     | LavenderBlush3 | 205 193 197 | #CDC1C5  |                                                                                      | PaleVioletRed3 | 205 104 137 | #CD6889 |
|  |                                                                                     | LavenderBlush4 | 139 131 134 | #8B8386  |                                                                                      | PaleVioletRed4 | 139 71 93   | #8B475D |
|  |  | MistyRose1     | 255 228 225 | #FFE4E1  |  | Maroon1        | 255 52 179  | #FF34B3 |
|  |  | MistyRose2     | 238 213 210 | #EED5D2  |  | Brown 2        | 238 48 167  | #EE30A7 |

|  |                                                                                     |                 |             |         |                                                                                      |               |             |         |
|--|-------------------------------------------------------------------------------------|-----------------|-------------|---------|--------------------------------------------------------------------------------------|---------------|-------------|---------|
|  |       | MistyRose3      | 205 183 181 | #CDB7B5 |       | Maroon3       | 205 41 144  | #CD2990 |
|  |     | MistyRose4      | 139 125 123 | #8B7D7B |     | Maroon4       | 139 28 98   | #8B1C62 |
|  |    | Azure1          | 240 255 255 | #F0FFFF |    | VioletRed1    | 255 62 150  | #FF3E96 |
|  |    | Azure2          | 224 238 238 | #E0EEEE |    | VioletRed2    | 238 58 140  | #EE3A8C |
|  |    | Azure3          | 193 205 205 | #C1CDCD |    | VioletRed3    | 205 50 120  | #CD3278 |
|  |    | Azure4          | 131 139 139 | #838B8B |    | VioletRed4    | 139 34 82   | #8B2252 |
|  |    | SlateBlue1      | 131 111 255 | #836FFF |    | Magenta1      | 255 0 255   | #FF00FF |
|  |    | SlateBlue2      | 122 103 238 | #7A67EE |    | Magenta2      | 238 0 238   | #EE00EE |
|  |    | SlateBlue3      | 105 89 205  | #6959CD |    | Magenta3      | 205 0 205   | #CD00CD |
|  |    | SlateBlue4      | 71 60 139   | #473C8B |    | Magenta4      | 139 0 139   | #8B008B |
|  |    | RoyalBlue1      | 72 118 255  | #4876FF |    | Orchid1       | 255 131 250 | #FF83FA |
|  |    | RoyalBlue2      | 67 110 238  | #436EEE |    | Orchid2       | 238 122 233 | #EE7AE9 |
|  |    | RoyalBlue3      | 58 95 205   | #3A5FCD |    | Orchid3       | 205 105 201 | #CD69C9 |
|  |    | RoyalBlue4      | 39 64 139   | #27408B |    | Orchid4       | 139 71 137  | #8B4789 |
|  |    | Blue1           | 0 0 255     | #0000FF |    | Plum1         | 255 187 255 | #FFBBFF |
|  |    | Blue2           | 0 0 238     | #0000EE |    | Plum2         | 238 174 238 | #EEEEEE |
|  |    | Blue3           | 0 0 205     | #0000CD |    | Plum3         | 205 150 205 | #CD96CD |
|  |   | Blue4           | 0 0 139     | #00008B |   | Plum4         | 139 102 139 | #8B668B |
|  |  | DodgerBlue1     | 30 144 255  | #1E90FF |  | MediumOrchid1 | 224 102 255 | #E066FF |
|  |  | DodgerBlue2     | 28 134 238  | #1C86EE |  | MediumOrchid2 | 209 95 238  | #D15FEE |
|  |  | DodgerBlue3     | 24 116 205  | #1874CD |  | MediumOrchid3 | 180 82 205  | #B452CD |
|  |  | DodgerBlue4     | 16 78 139   | #104E8B |  | MediumOrchid4 | 122 55 139  | #7A378B |
|  |  | SteelBlue1      | 99 184 255  | #63B8FF |  | DarkOrchid1   | 191 62 255  | #BF3EFF |
|  |  | SteelBlue2      | 92 172 238  | #5CACEE |  | DarkOrchid2   | 178 58 238  | #B23AEE |
|  |  | SteelBlue3      | 79 148 205  | #4F94CD |  | DarkOrchid3   | 154 50 205  | #9A32CD |
|  |  | SteelBlue4      | 54 100 139  | #36648B |  | DarkOrchid4   | 104 34 139  | #68228B |
|  |  | DeepSkyBlue1    | 0 191 255   | #00BFFF |  | Purple1       | 155 48 255  | #9B30FF |
|  |  | DeepSkyBlue2    | 0 178 238   | #00B2EE |  | Purple2       | 145 44 238  | #912CEE |
|  |  | DeepSkyBlue3    | 0 154 205   | #009ACD |  | Purple3       | 125 38 205  | #7D26CD |
|  |  | DeepSkyBlue4    | 0 104 139   | #00688B |  | Purple4       | 85 26 139   | #551A8B |
|  |  | SkyBlue1        | 135 206 255 | #87CEFF |  | MediumPurple1 | 171 130 255 | #AB82FF |
|  |  | SkyBlue2        | 126 192 238 | #7EC0EE |  | MediumPurple2 | 159 121 238 | #9F79EE |
|  |  | SkyBlue3        | 108 166 205 | #6CA6CD |  | MediumPurple3 | 137 104 205 | #8968CD |
|  |  | SkyBlue4        | 74 112 139  | #4A708B |  | MediumPurple4 | 93 71 139   | #5D478B |
|  |  | LightSkyBlue1   | 176 226 255 | #B0E2FF |  | Thistle1      | 255 225 255 | #FE1FFF |
|  |  | LightSkyBlue2   | 164 211 238 | #A4D3EE |  | Thistle2      | 238 210 238 | #EED2EE |
|  |  | LightSkyBlue3   | 141 182 205 | #8DB6CD |  | Thistle3      | 205 181 205 | #CDB5CD |
|  |  | LightSkyBlue4   | 96 123 139  | #607B8B |  | Thistle4      | 139 123 139 | #8B7B8B |
|  |  | SlateGray1      | 198 226 255 | #C6E2FF |  | grey11        | 28 28 28    | #1C1C1C |
|  |  | SlateGray2      | 185 211 238 | #B9D3EE |  | grey21        | 54 54 54    | #363636 |
|  |                                                                                     | SlateGray3      | 159 182 205 | #9FB6CD |  | grey31        | 79 79 79    | #4F4F4F |
|  |                                                                                     | SlateGray4      | 108 123 139 | #6C7B8B |  | grey41        | 105 105 105 | #696969 |
|  |  | LightSteelBlue1 | 202 225 255 | #CAE1FF |  | grey51        | 130 130 130 | #828282 |
|  |  | LightSteelBlue2 | 188 210 238 | #BCD2EE |  | grey61        | 156 156 156 | #9C9C9C |

|  |                 |             |         |  |             |             |         |
|--|-----------------|-------------|---------|--|-------------|-------------|---------|
|  | LightSteelBlue3 | 162 181 205 | #A2B5CD |  | grey71      | 181 181 181 | #B5B5B5 |
|  | LightSteelBlue4 | 110 123 139 | #6E7B8B |  | gray81      | 207 207 207 | #CFCFCF |
|  | LightBlue1      | 191 239 255 | #BFEFFF |  | gray91      | 232 232 232 | #E8E8E8 |
|  | LightBlue2      | 178 223 238 | #B2DFEE |  | DarkGrey    | 169 169 169 | #A9A9A9 |
|  | LightBlue3      | 154 192 205 | #9AC0CD |  | DarkBlue    | 0 0 139     | #00008B |
|  | LightBlue4      | 104 131 139 | #68838B |  | DarkCyan    | 0 139 139   | #008B8B |
|  | LightCyan1      | 224 255 255 | #E0FFFF |  | DarkMagenta | 139 0 139   | #8B008B |
|  | LightCyan2      | 209 238 238 | #D1EEEE |  | DarkRed     | 139 0 0     | #8B0000 |
|  | LightCyan3      | 180 205 205 | #B4CDCD |  |             |             |         |
|  | LightCyan4      | 122 139 139 | #7A8B8B |  | LightGreen  | 144 238 144 | #90EE90 |
